# Supplementary material for: Normalizing Metabolism in Diabetic Pregnancy: Is It Time to Target Lipids?
Source: Oxford University Press journal article supplement (doi:10.2337/dc13-1934), 2014-04-10
Supplement: dc131934supplementarydata.pdf [file dc131934supplementarydata.pdf]

SUPPLEMENTARY DATA

**Supplementary Table 1.** Studies examining maternal lipids in pre-existing and gestational diabetes mellitus. \*

| Reference                                                        | n  | Type of diabetes                                                                                                                               | HbA1c %<br>(mmol/mol)                                                                                                   | BMI<br>(kg/m <sup>2</sup> ) | Blood<br>sampling                                                                                                                            | Main outcomes                                                                                                                                                                                                                                             |
|------------------------------------------------------------------|----|------------------------------------------------------------------------------------------------------------------------------------------------|-------------------------------------------------------------------------------------------------------------------------|-----------------------------|----------------------------------------------------------------------------------------------------------------------------------------------|-----------------------------------------------------------------------------------------------------------------------------------------------------------------------------------------------------------------------------------------------------------|
| Studies examining pre-existing diabetes                          |    |                                                                                                                                                |                                                                                                                         |                             |                                                                                                                                              |                                                                                                                                                                                                                                                           |
| Montelongo, 1992 (1)<br><br>Spain<br><br>No comment on ethnicity | 12 | Normal                                                                                                                                         | FT 4.50 ± 0.36SE<br>(26 ± 3.9 SE)<br>ST 4.30 ± 0.43SE<br>(23 ± 4.7)<br>TT 4.40 ± 0.27SE<br>(25 ± 3.0SE)                 | PP 22.4 ± 0.4SE             | Following a 12h overnight fast, prior to morning insulin dose. Samples at gestational wks. 9-10, 21-23, 32-24, postpartum and post lactation | FFA levels ↑ in pre-existing and gestational diabetes compared to normal Triglycerides, VLDL-triglyceride, LDL-triglyceride, HDL-triglyceride and VLDL-C, LDL-C, HDL-C increased over gestation but no difference between diabetic and normal pregnancies |
|                                                                  | 12 | Pre-existing DM (10 T1DM, T2DM)                                                                                                                | FT 6.43 ± 0.26SE<br>(47 ± 2.8SE)<br>ST 5.54 ± 0.20SE<br>(37 ± 2.2SE)<br>TT 5.52 ± 0.17SE<br>(37 ± 1.9)                  | PP 22.2 ± 0.3SE             |                                                                                                                                              |                                                                                                                                                                                                                                                           |
|                                                                  | 9  | GDM<br><br>Diagnosed in the first trimester using a 50gGCT and 100g OGTT based on the 2 <sup>nd</sup> International workshop conference on GDM | FT 5.37 ± 0.37SE<br>(35 ± 4.0SE)<br>ST 4.83 ± 0.18SE<br>(29 ± 2.0SE)<br>TT 4.90 ± 0.18SE<br>(30 ± 2.0SE)                | PP 23.3 ± 0.6SE             |                                                                                                                                              |                                                                                                                                                                                                                                                           |
| Biesenbach, 1994 (2)<br><br>Austria<br>No comment on ethnicity   | 10 | T1DM                                                                                                                                           | PP 6.9 ± 0.9 SD (52 ± 9.8 SD)<br>FT 5.9 ± 0.6 SD (41 ± 6.6 SD)<br>ST 5.3 ± 0.4 SD (34 ± 4.4 SD)<br>TT 5.2 ± 0.5 SD (5.2 | Weight FT 62 kg ± 9 SD      | After an overnight fast<br><br>Blood tests at 12 <sup>th</sup> , 20 <sup>th</sup> , 24 <sup>th</sup> weeks then every 4                      | Women with macroproteinuria had ↑ cholesterol, triglycerides, LDL-C and lower HDL-C in the third trimester compared to those without macroproteinuria<br><br>The total and percent increase in                                                            |

SUPPLEMENTARY DATA

|                                                                      |    |                                                          |                                                                                                                                    |                            |                                                                                                                                                                           |                                                                                                                                                                                                                                                                                                                                                                                                                                                                                                                                              |
|----------------------------------------------------------------------|----|----------------------------------------------------------|------------------------------------------------------------------------------------------------------------------------------------|----------------------------|---------------------------------------------------------------------------------------------------------------------------------------------------------------------------|----------------------------------------------------------------------------------------------------------------------------------------------------------------------------------------------------------------------------------------------------------------------------------------------------------------------------------------------------------------------------------------------------------------------------------------------------------------------------------------------------------------------------------------------|
|                                                                      |    |                                                          | ± 5.5 SD)                                                                                                                          |                            | weeks until delivery                                                                                                                                                      | cholesterol and LDL-C across gestation was greater in women with macroproteinuria whereas the percent increase in triglycerides was similar between the groups and HDL fell in women with macroproteinuria.                                                                                                                                                                                                                                                                                                                                  |
|                                                                      | 5  | T1DM with macroproteinuria (>0.05g protein/24H in urine) | PP 7.6 ± 0.4 SD (60 ± 4.4 SD)<br>FT 7.1 ± 0.7 SD (54 ± 7.7 SD)<br>ST 6.6 ± 1.2 SD (49 ± 13.1 SD)<br>TT 6.1 ± 1.2 SD (43 ± 13.1 SD) | Weight FT 63 kg ± SD 6 SD  |                                                                                                                                                                           |                                                                                                                                                                                                                                                                                                                                                                                                                                                                                                                                              |
| Kilby 1998 (3)<br>United Kingdom<br>Caucasian<br>Values median (IQR) | 22 | Normal                                                   | TT 6.8 (IQR 6.3 – 7.8) (51, IQR 45 – 62) **                                                                                        | PP 24.3, (IQR 23.6 – 25.3) | Fasting, at time of planned caesarean section. Maternal glucose was maintained between 3-6 using an IV dextrose and insulin infusion (unclear if this was in both groups) | Women with T1DM had ↓ free fatty acids concentrations, and ↑ HDL-phospholipid concentration compared to normal women. The increase in HDL-phospholipid concentration was due to an increase in HDL <sub>2</sub> -phospholipid concentration. Total cholesterol and triglyceride levels were not different. The cord blood of infants born to women with T1DM was higher in cholesterol, triglycerides, Apo-AI and Apo-B. Additionally, the cord blood HDL had a composition more similar to maternal HDL in infants born to women with T1DM. |
|                                                                      | 10 | T1DM                                                     | TT 9.6, (IQR 8.2 – 10.7) (81, IQR 66 – 93)                                                                                         | PP 25.2, (IQR 24.2 – 26.7) |                                                                                                                                                                           |                                                                                                                                                                                                                                                                                                                                                                                                                                                                                                                                              |
| Merzouk, 2000 (4)<br>Algeria<br>No comment on ethnicity              | 30 | Normal                                                   | TT 5.8 ± 0.2 SEM (40 ± 2.2 SEM)                                                                                                    | 21.8 ± 2.3 SEM             | Fasting blood samples at < 8 weeks gestation and within 48 hours of delivery                                                                                              | Women with good glucose control had similar lipoprotein levels to control women. No difference in cholesterol concentration between groups in the first or third trimester. ↑ total triglycerides, VLDL triglycerides, HDL <sub>2</sub> -triglyceride content, HDL <sub>3</sub> -triglyceride content, Apo B-100 in the                                                                                                                                                                                                                      |
|                                                                      | 20 | T1DM, well controlled                                    | TT 6.1 ± 0.3 SEM (43 ± 3.3 SEM)                                                                                                    | 22.14 ± 2.01 SEM           |                                                                                                                                                                           |                                                                                                                                                                                                                                                                                                                                                                                                                                                                                                                                              |
|                                                                      | 20 | T1DM, poorly controlled                                  | TT 8.9 ± 0.3 SEM (74 ± 3.3 SEM)                                                                                                    | 22.4 ± 1.9 SEM             |                                                                                                                                                                           |                                                                                                                                                                                                                                                                                                                                                                                                                                                                                                                                              |

SUPPLEMENTARY DATA

|                                                               |    |                                                      |                                    |                |                                                                                     |                                                                                                                                                                                                                                                                                                                                                                                                                                                                                                                                                                                                            |
|---------------------------------------------------------------|----|------------------------------------------------------|------------------------------------|----------------|-------------------------------------------------------------------------------------|------------------------------------------------------------------------------------------------------------------------------------------------------------------------------------------------------------------------------------------------------------------------------------------------------------------------------------------------------------------------------------------------------------------------------------------------------------------------------------------------------------------------------------------------------------------------------------------------------------|
|                                                               |    |                                                      |                                    |                |                                                                                     | women with poor glucose control compared to control and those with good control in both the first and third trimesters<br>↓ HDL <sub>3</sub> -cholesterol and lower Apo A-I in the women with poor glucose control compared to control and those with good control in both the first and third trimesters                                                                                                                                                                                                                                                                                                  |
| Merzouk 2000 (5)<br>Algeria<br>No comment on ethnicity        | 20 | T1DM, poorly controlled and macrosomic infant        | TT 8.9 ± 0.3 SEM<br>(74 ± 3.3 SEM) | 22.4 ± 1.9 SEM | Fasting sample, collected within 48 hours of delivery                               | Women with well controlled diabetes had lipoprotein and apolipoproteins levels similar to non-diabetic women<br>Women with poorly controlled diabetes had higher triglyceride, VLDL, Apo B-100 and HDL triglyceride concentrations, and lower Apo A-I and HDL <sub>3</sub> concentrations than non-diabetic women. Macrosomic infants born with women with poorly controlled diabetes had ↑ concentrations of all lipoproteins, Apo A-I and Apo B-100 than appropriately grown infants<br>Macrosomic infants born to non-diabetic mothers had similar lipoprotein profiles to appropriately grown infants. |
|                                                               | 20 | T1DM, well controlled and appropriately grown infant | TT 6.3 ± 0.4 SEM<br>(45 ± 4.4 SEM) | 22.1 ± 1.6 SEM |                                                                                     |                                                                                                                                                                                                                                                                                                                                                                                                                                                                                                                                                                                                            |
|                                                               | 18 | Non-diabetic women with macrosomic infant            | TT 6.0 ± 0.3 SEM<br>(42 ± 3.3 SEM) | 22.8 ± 1.7 SEM |                                                                                     |                                                                                                                                                                                                                                                                                                                                                                                                                                                                                                                                                                                                            |
|                                                               | 30 | Non-diabetic women with appropriately grown infant   | TT 5.8 ± 0.2 SEM<br>(40 ± 2.2 SEM) | 21.8 ± 2.3 SEM |                                                                                     |                                                                                                                                                                                                                                                                                                                                                                                                                                                                                                                                                                                                            |
| Toescu, 2004 (6)<br>United Kingdom<br>No comment on ethnicity | 17 | Normal                                               | -                                  | 24.9 ± 1.1 SEM | Non fasting, morning sample 2 hours after breakfast. Samples taken week 12, 24, 36. | Total cholesterol and triglycerides ↑ in all groups through pregnancy but no difference between groups except that women with GDM had higher triglycerides in the second trimester than normal<br>Small dense LDL ↑ in all diabetic groups compared to normal but no difference between diabetic groups.<br>Total antioxidant capacity was lower in                                                                                                                                                                                                                                                        |
|                                                               | 19 | T1DM                                                 |                                    | 27.6 ± 1.2 SEM |                                                                                     |                                                                                                                                                                                                                                                                                                                                                                                                                                                                                                                                                                                                            |
|                                                               | 12 | T2DM                                                 |                                    | 30.7 ± 2.2 SEM |                                                                                     |                                                                                                                                                                                                                                                                                                                                                                                                                                                                                                                                                                                                            |
|                                                               | 12 | GDM                                                  |                                    | 30.9 ± 1.7 SEM |                                                                                     |                                                                                                                                                                                                                                                                                                                                                                                                                                                                                                                                                                                                            |

SUPPLEMENTARY DATA

|                                                                                                |     |                                               |                                                                                                  |                                 |                                                                                                                                      |                                                                                                                                                                                                                                                                                                                                                                                                                                                                                                                                                                                                                                                                                                                                                    |
|------------------------------------------------------------------------------------------------|-----|-----------------------------------------------|--------------------------------------------------------------------------------------------------|---------------------------------|--------------------------------------------------------------------------------------------------------------------------------------|----------------------------------------------------------------------------------------------------------------------------------------------------------------------------------------------------------------------------------------------------------------------------------------------------------------------------------------------------------------------------------------------------------------------------------------------------------------------------------------------------------------------------------------------------------------------------------------------------------------------------------------------------------------------------------------------------------------------------------------------------|
|                                                                                                |     |                                               |                                                                                                  |                                 |                                                                                                                                      | women with diabetes throughout pregnancy, lipid hydroperoxides higher in all diabetic women compared to normal                                                                                                                                                                                                                                                                                                                                                                                                                                                                                                                                                                                                                                     |
| Wender-Ozegowska, 2011 (7)<br>Poland<br>No comment on ethnicity<br><br>Median (min-max values) | 24  | T1DM with metabolic syndrome pre-pregnancy    | FT 6.9, (range 5.5-9.3) (52, range 37 – 78) **<br>TT 6.6, (range 5.1-7.9) (49, range 32 – 63) ** | PP 30.8, (range 21.7-42.4) **   | Fasting maternal bloods collected between 8-13 weeks and again in the week before delivery.<br><br>Retrospective observational study | Triglycerides were ↑ and HDL-C ↓ in the first trimester in women with metabolic syndrome<br>There were no differences in lipoprotein concentrations in the third trimester.<br>In women with metabolic syndrome the only lipoprotein to change significantly from first to third trimester was HDL, which increased.<br>In women without metabolic syndrome, triglyceride, cholesterol, HDL-C, LDL-C increased from first to third trimester<br>Oxidised LDL-C was not different between women with and without metabolic syndrome and did not change from first to third trimester<br>Oxidised LDL-C was higher in those women with hypertension<br>There were no differences in infant outcome between women with and without metabolic syndrome |
|                                                                                                | 74  | T1DM without metabolic syndrome pre-pregnancy | FT 7.6, (range 5.0-13.2) (60, range 31-121) **<br>TT 6.4, (range 4.9-9.4) (46, range 30-79) **   | PP 20.8, (range 16.0 – 35.8) ** |                                                                                                                                      |                                                                                                                                                                                                                                                                                                                                                                                                                                                                                                                                                                                                                                                                                                                                                    |
| Gobl 2010 (8)<br>Austria<br>No comment on ethnicity                                            | 137 | Normal                                        | -                                                                                                | -                               | unclear                                                                                                                              | Women with T2DM had ↑ triglycerides and ↓ HDL-C than women with T1DM in the first trimester<br>In the third trimester, the lipid levels of women with T1DM were similar to those in women with normal glucose tolerance.<br>In the third trimester, women with T1DM had higher cholesterol, LDL-C and HDL-C than women with T2DM<br>Elevated triglycerides and low HDL cholesterol in the third trimester were                                                                                                                                                                                                                                                                                                                                     |
|                                                                                                | 109 | T1DM                                          | 7.2 ± 1.4 SD (55 ± 15.3 SD)                                                                      | 24.8 ± 3.8 SD                   |                                                                                                                                      |                                                                                                                                                                                                                                                                                                                                                                                                                                                                                                                                                                                                                                                                                                                                                    |
|                                                                                                | 64  | T2DM                                          | 6.8 ± 1.3 SD (51 ± 14.2 SD)                                                                      | 32.0 ± 7.4 SD                   |                                                                                                                                      |                                                                                                                                                                                                                                                                                                                                                                                                                                                                                                                                                                                                                                                                                                                                                    |

SUPPLEMENTARY DATA

|                                                                                 |     |                                                                                  |                                        |                   |                                                                                                                                                                                                          |                                                                                                                                                                                                                                                                                                                                                                                                                                                                                                                       |
|---------------------------------------------------------------------------------|-----|----------------------------------------------------------------------------------|----------------------------------------|-------------------|----------------------------------------------------------------------------------------------------------------------------------------------------------------------------------------------------------|-----------------------------------------------------------------------------------------------------------------------------------------------------------------------------------------------------------------------------------------------------------------------------------------------------------------------------------------------------------------------------------------------------------------------------------------------------------------------------------------------------------------------|
|                                                                                 |     |                                                                                  |                                        |                   |                                                                                                                                                                                                          | significant predictors for LGA infants, and remained significant after correction for maternal age and HbA1c                                                                                                                                                                                                                                                                                                                                                                                                          |
| Basu, 2012 (9)<br><br>Austria, Norway, United States<br>No comment on ethnicity | 21  | Normal                                                                           | FT $5.0 \pm 0.3$ SD (31 $\pm 3.3$ SD)  | FT $24 \pm 4$ SD  | Overnight fast, samples taken before insulin administration at 12, 22, 32 weeks gestation. (Blood also taken at term but not shown here)<br><br>Note, none of the preeclampsia term bloods were fasting. | Women with T1DM who later developed preeclampsia had higher LDL-C in early pregnancy and higher total cholesterol and LDL-C in the second trimester than women with T1DM who did not develop preeclampsia<br>Women with T1DM who did not develop preeclampsia had lower triglycerides and VLDL-C in the first trimester than women without diabetes<br>HDL-C did not differ between groups<br>Women with T1DM who later developed preeclampsia had increased large LDL particles, increase ApoB and ApoB:ApoAI ratio. |
|                                                                                 | 26  | T1DM + preeclampsia                                                              | FT $7.3 \pm 1.1$ SD (56 $\pm 12.0$ SD) | FT $28 \pm 6$ SD  |                                                                                                                                                                                                          |                                                                                                                                                                                                                                                                                                                                                                                                                                                                                                                       |
|                                                                                 | 92  | T1DM                                                                             | FT $6.8 \pm 1.1$ SD (51 $\pm 12.0$ SD) | FT $26 \pm 5$ SD  |                                                                                                                                                                                                          |                                                                                                                                                                                                                                                                                                                                                                                                                                                                                                                       |
| Studies examining gestational diabetes mellitus                                 |     |                                                                                  |                                        |                   |                                                                                                                                                                                                          |                                                                                                                                                                                                                                                                                                                                                                                                                                                                                                                       |
| Knopp 1992 (10)<br><br>United States<br>No comment on ethnicity                 | 521 | Normal                                                                           | ST $4.7 \pm 0.6$ SD (28 $\pm 6.6$ SD)  | $22.5 \pm 3.6$ SD | Taken 1 hour after 50g oral glucose after an overnight fast between 24-32 weeks gestation                                                                                                                | Women with GDM had higher triglycerides than the other two groups which were similar to each other                                                                                                                                                                                                                                                                                                                                                                                                                    |
|                                                                                 | 264 | Abnormal 50gGCT, normal 75g OGTT                                                 | ST $4.9 \pm 0.7$ SD (30 $\pm 7.7$ SD)  | $22.8 \pm 4.1$ SD |                                                                                                                                                                                                          |                                                                                                                                                                                                                                                                                                                                                                                                                                                                                                                       |
|                                                                                 | 96  | GDM<br><br>100g OGTT by Carpenter and Coustan criteria (5.3/10.1/8.7/4.8 mmol/L) | ST $5.2 \pm 0.7$ SD (33 $\pm 7.7$ SD)  | $23.8 \pm 4.6$ SD |                                                                                                                                                                                                          |                                                                                                                                                                                                                                                                                                                                                                                                                                                                                                                       |
| Koukkou, 1996 (11)                                                              | 22  | Normal                                                                           | ST $6.0 \pm 0.7$ SD (42 $\pm$          | $29.7 \pm 5.1$    | Fasting                                                                                                                                                                                                  | Women with GDM had elevated                                                                                                                                                                                                                                                                                                                                                                                                                                                                                           |

SUPPLEMENTARY DATA

|                                                                  |     |                                                                                                                     |                                                                                      |                            |                                                                                                   |                                                                                                                                                                                                                                                    |
|------------------------------------------------------------------|-----|---------------------------------------------------------------------------------------------------------------------|--------------------------------------------------------------------------------------|----------------------------|---------------------------------------------------------------------------------------------------|----------------------------------------------------------------------------------------------------------------------------------------------------------------------------------------------------------------------------------------------------|
| United Kingdom                                                   | 20  | GDM                                                                                                                 | 7.7 SD)<br>ST $6.6 \pm 0.7$ SD ( $49 \pm 7.7$ SD)                                    | SD<br>$32.2 \pm 5.2$ SD    | bloods at the time of OGTT                                                                        | triglycerides and lower LDL-C compared to normal                                                                                                                                                                                                   |
| Mixed ethnicity, mostly Caucasian, Asian, African/Afrocaribbeans |     | Diagnosis per the EASD criteria: glucose > 9 mmol/L at 120 mins post glucose load                                   |                                                                                      |                            |                                                                                                   |                                                                                                                                                                                                                                                    |
| Clark 1997 (12)                                                  | 126 | Normal                                                                                                              | -                                                                                    | 27.5, (IQR 22.8 – 32.8) ** | Blood samples taken at fasting and 2H during the OGTT<br>Median gestation of screening 27.6 weeks | Women with GDM had higher fasting triglycerides and free fatty acids and higher 2H triglycerides.<br>Women with GDM had lower HDL-C fasting                                                                                                        |
| United States                                                    | 52  | GDM                                                                                                                 | -                                                                                    | 30.4, (IQR 24.9 – 42.2) ** |                                                                                                   |                                                                                                                                                                                                                                                    |
| Median, IQR                                                      |     | GDM diagnosed by 50g GCT – positive if > 7.2 at 1H<br>Followed by a 100g 3H test: any two of 5.3/9.5/8.3/7.4 mmol/L |                                                                                      |                            |                                                                                                   |                                                                                                                                                                                                                                                    |
| Couch 1998 (13)                                                  | 25  | Normal                                                                                                              | ST $4.56 \pm 0.34$ SD ( $26 \pm 3.7$ SD)<br>TT $4.77 \pm 0.37$ SD ( $29 \pm 4.0$ SD) | PP $23.6 \pm 3.6$ SD       | Fasting samples after GDM diagnosis and before treatment, at 33-34 weeks and at 37-38 weeks.      | Women with GDM had higher plasma triglycerides and higher HDL and VLDL triglyceride content.<br>In women with GDM, there were increased VLDL core lipids (triglycerides and cholesterol) and the triglyceride/cholesterol ratio was higher in HDL. |
| United States                                                    | 25  | GDM                                                                                                                 | ST $4.98 \pm 0.48$ SD ( $31 \pm 5.2$ SD)<br>TT $5.05 \pm 0.49$ SD ( $32 \pm 5.4$ SD) | PP $25.6 \pm 6.3$ SD       |                                                                                                   |                                                                                                                                                                                                                                                    |
| Mixed ethnicity, Mainly Caucasian                                |     | GDM diagnosed by the O’Sullivan and National                                                                        |                                                                                      |                            |                                                                                                   |                                                                                                                                                                                                                                                    |

SUPPLEMENTARY DATA

|                                      |     | Diabetes Data Group criteria                                                                                               |                                |                                                           |                                                                                     |                                                                                                                                                                                                                                                                                                                                                                                                                                                                                                                                                                                                                               |
|--------------------------------------|-----|----------------------------------------------------------------------------------------------------------------------------|--------------------------------|-----------------------------------------------------------|-------------------------------------------------------------------------------------|-------------------------------------------------------------------------------------------------------------------------------------------------------------------------------------------------------------------------------------------------------------------------------------------------------------------------------------------------------------------------------------------------------------------------------------------------------------------------------------------------------------------------------------------------------------------------------------------------------------------------------|
| Barden, 2004 (14)                    | 22  | GDM + preeclampsia                                                                                                         | 5.27 ± 0.16 SEM (34 ± 1.7 SEM) | PP 33.7 ± 1.4 SEM                                         | Fasting sample at 28 weeks gestation                                                | 12% of women with GDM developed preeclampsia<br>At diagnosis of GDM, there was no difference in lipoproteins between women who later did or did not develop preeclampsia<br>In logistic regression, the significant independent predictors for developing preeclampsia were fasting glucose, c-reactive protein, family history of hypertension, and the proband's mother having gestational diabetes                                                                                                                                                                                                                         |
| Australia<br>No comment on ethnicity | 162 | GDM<br>GDM diagnosed using ADIPS criteria after 75gOGTT                                                                    | 5.03 ± 0.04 SEM (31 ± 0.4 SEM) | PP 29.8 ± 0.4 SEM                                         |                                                                                     |                                                                                                                                                                                                                                                                                                                                                                                                                                                                                                                                                                                                                               |
| Di Cianni, 2005 (15)                 | 121 | Normal                                                                                                                     | -                              | PP 23.6 ± 4 SD<br><br>Data given for the group as a whole | Fasting sample at the time of the oral glucose tolerance test at 27 weeks gestation | Triglycerides significantly ↑ in women with GDM compared to IGT or normal at 28 weeks<br>Macrosomia and LGA were more common in IGT than in GDM or normal<br>In women with IGT, the incidence of LGA infants was increased in those with triglyceride levels > 75 <sup>th</sup> centile (2.30 mmol/L)<br>Pre-pregnancy BMI, weight gain in pregnancy, fasting serum triglycerides, and 2H post OGTT glucose levels were all positively and significantly associated with neonatal body weight<br>With multiple regression, only pre-pregnancy BMI and serum triglycerides remained significantly associated with birth weight |
| Italy                                | 23  | Impaired glucose tolerance                                                                                                 |                                |                                                           |                                                                                     |                                                                                                                                                                                                                                                                                                                                                                                                                                                                                                                                                                                                                               |
| No comment on ethnicity              | 36  | GDM<br>Impaired glucose tolerance and GDM diagnosed using a 50g CGT then a 100g OGTT, using Carpenter and Coustan criteria |                                |                                                           |                                                                                     |                                                                                                                                                                                                                                                                                                                                                                                                                                                                                                                                                                                                                               |
| Sanchez-Vera, 2007 (16)              | 34  | Non-diabetic and BMI<25                                                                                                    | -                              | 21.6 ± 1.70 SD                                            | Sample after overnight fasting at                                                   | Women with GDM had higher triglycerides and cholesterol compared to                                                                                                                                                                                                                                                                                                                                                                                                                                                                                                                                                           |
|                                      | 11  | Non-diabetic and                                                                                                           | -                              | 28.5 ± 2.4                                                |                                                                                     |                                                                                                                                                                                                                                                                                                                                                                                                                                                                                                                                                                                                                               |

SUPPLEMENTARY DATA

|                                                                                                                   |     |                                                                                                             |              |                        |                                                                                                                |                                                                                                                                                                                                                                                                                  |
|-------------------------------------------------------------------------------------------------------------------|-----|-------------------------------------------------------------------------------------------------------------|--------------|------------------------|----------------------------------------------------------------------------------------------------------------|----------------------------------------------------------------------------------------------------------------------------------------------------------------------------------------------------------------------------------------------------------------------------------|
| Spain<br>Caucasian                                                                                                | 20  | BMI>25<br>GDM and BMI <25                                                                                   | ST 4.73 (28) | SD<br>22.2 ± 2.1<br>SD | week 15, 24,<br>32.                                                                                            | non-diabetic women from the first trimester onward<br>LDL from women with GDM had increased susceptibility to oxidation                                                                                                                                                          |
|                                                                                                                   | 42  | GDM and BMI > 25<br><br>GDM diagnosis by American Diabetes Association criteria at 24 weeks using a 50g GCT |              | 30.5 ± 4.22 SD         |                                                                                                                |                                                                                                                                                                                                                                                                                  |
| Qiu, 2007 (17)<br>United States<br><br>Mixed ethnicity, primarily non-Hispanic White, African American and Other. | 96  | Normal                                                                                                      | -            | PP 22.8 ± 0.4 SE       | Non-fasting blood samples collected intrapartum                                                                | Mean LDL particle size is reduced in women with GDM<br>The OR 1.8 (95%CI 0.9-3.3) of developing GDM for every 10-A reduction in LDL particle size                                                                                                                                |
|                                                                                                                   | 105 | GDM<br><br>GDM diagnosed by the National Diabetes Data Group expert committee 1997 criteria using 100g OGTT | -            | PP 29.5 ± 0.7 SE       |                                                                                                                |                                                                                                                                                                                                                                                                                  |
| Schaefer-Graf, 2008 (18)<br><br>Germany                                                                           | 150 | GDM<br><br>GDM diagnosed with a 75g OGTT using the Carpenter and Coustan criteria                           | -            | PP 27.8 ± 6.2 SD       | Taken at 28 weeks, 32, 36 and 39 weeks gestation. Reported on bloods close to delivery. Fasting status unclear | Maternal triglycerides and free fatty acids correlated positively with fetal abdominal circumference, and with birth weight and infant fat mass<br>After adjustment maternal free fatty acids and triglycerides at delivery remained positively and significantly related to LGA |
| Szymanska 2008 (20)                                                                                               | 41  | Normal                                                                                                      | -            | PP 23.15               | Unclear if                                                                                                     | Women with GDM had higher                                                                                                                                                                                                                                                        |



SUPPLEMENTARY DATA

|                                   |    |                                                                                                                                                                                                                                                                                                                       |                               |                             |                                                                                                         |                                                                                                                                        |
|-----------------------------------|----|-----------------------------------------------------------------------------------------------------------------------------------------------------------------------------------------------------------------------------------------------------------------------------------------------------------------------|-------------------------------|-----------------------------|---------------------------------------------------------------------------------------------------------|----------------------------------------------------------------------------------------------------------------------------------------|
| Poland<br>No comment on ethnicity |    |                                                                                                                                                                                                                                                                                                                       |                               | ± 0.56<br>fault             | fasting.                                                                                                | triglyceride levels                                                                                                                    |
|                                   | 81 | GDM<br>GDM diagnosed with fasting glucose and a 50gCGT or a 75gOGTT<br>Fasting above 6.9 mmol/L twice = GDM,<br>If on the 50 GGCT 1H glucose > 11.1 mmol/L, GDM was diagnosed.<br>If 1H between 7.8 mmol/L and 11.1 mmol/L then a 75g OGTT was performed:<br>fasting 7.5 mmol/L, 1H 10 mmol/L, 2H 7.8 mmol/L then GDM | -                             | PP 25.94<br>± 0.73<br>fault | Average GDM diagnosis testing at 28 weeks<br><br>Samples were taken after diagnosis or exclusion of GDM |                                                                                                                                        |
| Rizzo, 2008 (21)                  | 23 | Normal                                                                                                                                                                                                                                                                                                                | ST 4.4 ± 0.6 SD (25 ± 6.6 SD) | PP 28 ± 4 SD                | Between 24-28 weeks                                                                                     | No difference in the concentration of any of the lipoproteins. They also measured Apo AI, Apo B and Lp(a) and there was no difference. |
| Turkey<br>No comment on ethnicity | 27 | GDM<br>GDM diagnosed by American Diabetes Association                                                                                                                                                                                                                                                                 | ST 5.1 ± 0.5 SD (32 ± 5.5 SD) | PP 29 ± 4 SD                | gestation, following a 12-14 hour overnight fast                                                        |                                                                                                                                        |

SUPPLEMENTARY DATA

|                                                                                         |     | criteria using a 100g OGTT                                                 |                               |                   |                                                                              |                                                                                                                                                                                                                                                                                  |
|-----------------------------------------------------------------------------------------|-----|----------------------------------------------------------------------------|-------------------------------|-------------------|------------------------------------------------------------------------------|----------------------------------------------------------------------------------------------------------------------------------------------------------------------------------------------------------------------------------------------------------------------------------|
| Marseille-Tremblay, 2008 (22)<br><br>Canada<br>No comment on ethnicity                  | 29  | Low cholesterol, no diabetes (cholesterol < the median 6.42 mmol/L)        | -                             | PP 23.2 ± 4.9 SEM | Bloods at delivery. Unclear fasting status, unclear if pre or post-delivery. | High maternal cholesterol at delivery is associated with higher LDL-C, ApoB100 and triglyceride concentrations in maternal blood<br>GDM was not associated with a difference in maternal lipid profile<br>Cord blood cholesterol was not different between groups                |
|                                                                                         | 30  | High cholesterol, no diabetes (cholesterol > the median 6.42 mmol/L)       | -                             | PP 21.0 ± 3.3 SEM |                                                                              |                                                                                                                                                                                                                                                                                  |
|                                                                                         | 7   | Normal cholesterol, no diabetes                                            | -                             | PP 22.5 ± 1.6 SEM |                                                                              |                                                                                                                                                                                                                                                                                  |
|                                                                                         | 7   | GDM<br><br>GDM diagnostic criteria unclear                                 | -                             | PP 28.0 ± 4.1 SEM |                                                                              |                                                                                                                                                                                                                                                                                  |
| Son, 2010 (23)<br>Korea<br>No comment on ethnicity                                      | 104 | GDM<br><br>GDM by 50g GCT then 100g OGTT by Carpenter and Coustan criteria | -                             | PP 23.2 ± 4.1 SD  | Fasting, within two weeks of diagnosis of GDM (24-32 weeks gestation)        | Maternal triglyceride levels were higher in mothers of LGA infants<br>No correlation was found between maternal glucose, total cholesterol, HDL cholesterol and infant weight                                                                                                    |
| Savvidou 2010 (24)<br><br>London<br><br>Mixed ethnicity, mainly Caucasian, Black, Asian | 248 | Normal                                                                     | -                             | FT 32.6 ± 5.2 SD  | Bloods taken at 11-13 weeks gestation, Fasting status unclear.               | Women who later developed GDM had higher triglycerides, LDL-C, and cholesterol and lower HDL-C in early pregnancy. This difference was significant even when adjusted for clinical factors including maternal age, GMI, ethnicity, parity, smoking, gestational age at sampling. |
|                                                                                         | 124 | GDM<br><br>Diagnosis based on 75g OGTT performed on patients selected      | FT 5.8 ± 0.8 SD (40 ± 8.7 SD) | FT 34.3 ± 5.0 SD  |                                                                              |                                                                                                                                                                                                                                                                                  |

SUPPLEMENTARY DATA

|                                                                               |     |                                                                                                                  |   |                              |                                                                                                                        |                                                                                                                                                                                                                                                                                                                                                                               |
|-------------------------------------------------------------------------------|-----|------------------------------------------------------------------------------------------------------------------|---|------------------------------|------------------------------------------------------------------------------------------------------------------------|-------------------------------------------------------------------------------------------------------------------------------------------------------------------------------------------------------------------------------------------------------------------------------------------------------------------------------------------------------------------------------|
|                                                                               |     | because of risk factors. Criteria per WHO. < 7 mmol/L fasting, < 7.8 mmol/L at 2H                                |   |                              |                                                                                                                        |                                                                                                                                                                                                                                                                                                                                                                               |
| Retnakaran 2010 (25)<br>Canada<br>Mixed ethnicity, mainly Caucasian and Asian | 87  | Normal                                                                                                           | - | PP 22.9 (IQR 21.3 – 26.1) ** | Fasting bloods at time of the OGTT in late second, early third trimester.<br>They also measured at 3 months postpartum | There were no significant differences in cholesterol, triglycerides, LDL-C, Apo B or apoA1.<br>HDL-C was lower in women with GDM Postpartum, cholesterol, triglycerides, apoB, LDL, cholesterol to HDL ratio all worsened across the groups from normal to GDM.                                                                                                               |
|                                                                               | 170 | Abnormal GCT, normal OGTT                                                                                        | - | PP 23.5 (IQR 21.2 – 27.5) ** |                                                                                                                        |                                                                                                                                                                                                                                                                                                                                                                               |
|                                                                               | 89  | Impaired glucose tolerance on OGTT                                                                               | - | PP 23.5 (21.9 – 27.9) IQR    |                                                                                                                        |                                                                                                                                                                                                                                                                                                                                                                               |
|                                                                               | 136 | GDM<br>GDM diagnosed by 100g OGTT per the National Diabetes Data Group 1979 (any two of 5.8/10.6/9.2/8.1 mmol/L) | - | PP 25.0 (22.0 – 30.1 ) IQR   |                                                                                                                        |                                                                                                                                                                                                                                                                                                                                                                               |
| Schaefer-Graf 2011 (19)<br>Germany                                            | 190 | Normal                                                                                                           | - | PP 25.7 ± SEM 0.4            | Fasting, either morning of caesarean section or within the week prior to delivery                                      | No difference in maternal glucose, triglycerides, free fatty acids or cholesterol levels between normal and GDM women<br>Cord blood glucose and free fatty acids were lower in infants born to uncomplicated pregnancy<br>In women without diabetes, maternal glucose and fatty acids and glycerol correlated with cord blood levels but not with neonatal weight or fat mass |
|                                                                               | 150 | GDM<br>Diagnosed using a 75g OGTT with Carpenter and Coustan criteria (5.0/10.0/8.6 mmol/L)                      | - | PP 27.7 ± SEM 0.4            |                                                                                                                        |                                                                                                                                                                                                                                                                                                                                                                               |

SUPPLEMENTARY DATA

|                                                                                                                                                                                 |     |                                                                 |                                  |                            |                                                                                         |                                                                                                                                                                                                                                                                                                |
|---------------------------------------------------------------------------------------------------------------------------------------------------------------------------------|-----|-----------------------------------------------------------------|----------------------------------|----------------------------|-----------------------------------------------------------------------------------------|------------------------------------------------------------------------------------------------------------------------------------------------------------------------------------------------------------------------------------------------------------------------------------------------|
| Barrett, 2013 (26)<br>New Zealand and Australia<br>Mixed ethnicity, predominately Caucasian, Polynesian, Asian, Indian.<br>From the Metformin in Gestational diabetes RCT (27). | 242 | GDM randomized to insulin                                       | TT 5.60 ± 1.10 SD (38 ± 12.0 SD) | TT 34.6 (95% CI 33.7–35.5) | Fasting after diagnosis of GDM prior to pharmacotherapy commencement<br>And at 36 weeks | Maternal triglycerides increased more from randomization to 36 weeks in women allocated metformin (21.93%) compared to those allocated insulin (9.69%)<br>The strongest associations with birth weight > 90 <sup>th</sup> centile were maternal triglycerides and measures of maternal glucose |
|                                                                                                                                                                                 | 236 | GDM randomized to metformin.<br>GDM diagnosed by ADIPS criteria | TT 5.60 ± 1.12 SD (38 ± 12.2 SD) | TT 35.2 (95% CI 34.2–36.2) |                                                                                         |                                                                                                                                                                                                                                                                                                |

\* This includes only studies from 1990 onward and only includes the changes noted during gestation rather than postpartum or during lactation. Where possible gestational timing of measurements has been stated. HbA1c has been given as % (mmol/mol). HbA1c in mmol/mol has been calculated using the Diabetes Care online calculator. Data for HbA1c and BMI are expressed as mean, except where marked as \*\* which indicate the median has been used.

Abbreviations as follows: PP pre-pregnancy, FT first trimester, ST second trimester, TT third trimester, T1DM type 1 diabetes mellitus, T2DM type 2 diabetes mellitus, GDM gestational diabetes mellitus, FFA free fatty acids, LDL-C low density lipoprotein, HDL high density lipoprotein, VLDL very low density lipoprotein, Apo apolipoproteins, IV intravenous, GCT glucose challenge test, OGTT oral glucose tolerance test, SE standard error, SEM standard error of the mean, SD standard deviation, 95%CI 95 percent confidence interval.

## References

1. Montelongo A, Lasuncion MA, Pallardo LF, Herrera E: Longitudinal study of plasma lipoproteins and hormones during pregnancy in normal and diabetic women. *Diabetes* 1992;41:1651-1659
2. Biesenbach G, Janko O, Stoger H, Zazgornik J: Increases in serum lipids during pregnancy in type 1 diabetic women with nephropathy. *Diabet Med* 1994;11:262-267
3. Kilby MD, Neary RH, Mackness MI, Durrington PN: Fetal and maternal lipoprotein metabolism in human pregnancy complicated by type I diabetes mellitus. *J Clin Endocrinol Metab* 1998;83:1736-1741
4. Merzouk H, Madani S, Korso N, Bouchenak M, Prost J, Belleville J: Maternal and fetal serum lipid and lipoprotein concentrations and compositions in type 1 diabetic pregnancy: relationship with maternal glycaemic control. *The Journal of laboratory and clinical medicine* 2000;136:441-448
5. Merzouk H, Bouchenak M, Loukidi B, Madani S, Prost J, Belleville J: Fetal macrosomia related to maternal poorly controlled type 1 diabetes strongly impairs serum lipoprotein concentrations and composition. *J Clin Pathol* 2000;53:917-923
6. Toescu V, Nuttall SL, Martin U, Nightingale P, Kendall MJ, Brydon P, Dunne F: Changes in plasma lipids and markers of oxidative stress in normal pregnancy and pregnancies complicated by diabetes. *Clin Sci (Lond)* 2004;106:93-98
7. Wender-Ozegowska E, Zawiejska A, Michalowska-Wender G, Iciek R, Wender M, Brazert J: Metabolic syndrome in type 1 diabetes mellitus. Does it have any impact on the course of pregnancy? *Journal of physiology and pharmacology : an official journal of the Polish Physiological Society* 2011;62:567-573
8. Gobl CS, Handisurya A, Klein K, Bozkurt L, Luger A, Bancher-Todesca D, Kautzky-Willer A: Changes in Serum Lipid Levels during Pregnancy in Type 1 and Type 2 Diabetic Subjects. *Diabetes Care* 2010;
9. Basu A, Alaupovic P, Wu M, Jenkins AJ, Yu Y, Nankervis AJ, Hanssen KF, Scholz H, Henriksen T, Lorentzen B, Clausen T, Garg SK, Menard MK, Hammad SM, Scardo JA, Stanley JR, Dashti A, Aston CE, Lyons TJ: Plasma lipoproteins and preeclampsia in women with type 1 diabetes: a prospective study. *J Clin Endocrinol Metab* 2012;97:1752-1762
10. Knopp RH, Magee MS, Walden CE, Bonet B, Benedetti TJ: Prediction of infant birth weight by GDM screening tests. Importance of plasma triglyceride. *Diabetes Care* 1992;15:1605-1613
11. Koukkou E, Watts GF, Lowy C: Serum lipid, lipoprotein and apolipoprotein changes in gestational diabetes mellitus: a cross-sectional and prospective study. *J Clin Pathol* 1996;49:634-637
12. Clark CM, Jr., Qiu C, Amerman B, Porter B, Fineberg N, Aldasouqi S, Golichowski A: Gestational diabetes: should it be added to the syndrome of insulin resistance? *Diabetes Care* 1997;20:867-871
13. Couch SC, Philipson EH, Bendel RB, Pujda LM, Milvae RA, Lammi-Keefe CJ: Elevated lipoprotein lipids and gestational hormones in women with diet-treated gestational diabetes mellitus compared to healthy pregnant controls. *J Diabetes Complications* 1998;12:1-9
14. Barden A, Singh R, Walters BN, Ritchie J, Roberman B, Beilin LJ: Factors predisposing to pre-eclampsia in women with gestational diabetes. *J Hypertens* 2004;22:2371-2378
15. Di Cianni G, Miccoli R, Volpe L, Lencioni C, Ghio A, Giovannitti MG, Cuccuru I, Pellegrini G, Chatzianagnostou K, Boldrini A, Del Prato S: Maternal triglyceride levels and newborn weight in pregnant women with normal glucose tolerance. *Diabetic Medicine* 2005;22:21-25
16. Sanchez-Vera I, Bonet B, Viana M, Quintanar A, Martin MD, Blanco P, Donnay S, Albi M: Changes in plasma lipids and increased low-density lipoprotein susceptibility to oxidation in pregnancies complicated by gestational diabetes: consequences of obesity. *Metabolism* 2007;56:1527-1533
17. Qiu C, Rudra C, Austin MA, Williams MA: Association of gestational diabetes mellitus and low-density lipoprotein (LDL) particle size. *Physiol Res* 2007;56:571-578

## SUPPLEMENTARY DATA

18. Schaefer-Graf UM, Graf K, Kulbacka I, Kjos SL, Dudenhausen J, Vetter K, Herrera E: Maternal lipids as strong determinants of fetal environment and growth in pregnancies with gestational diabetes mellitus. *Diabetes Care* 2008;31:1858-1863
19. Schaefer-Graf UM, Meitzner K, Ortega-Senovilla H, Graf K, Vetter K, Abou-Dakn M, Herrera E: Differences in the implications of maternal lipids on fetal metabolism and growth between gestational diabetes mellitus and control pregnancies. *Diabet Med* 2011;28:1053-1059
20. Szymanska M, Bomba-Opon DA, Wielgos M: Blood pressure and lipid changes in gestational diabetes mellitus. *Neuro Endocrinol Lett* 2008;29:328-333
21. Rizzo M, Berneis K, Altinova AE, Toruner FB, Akturk M, Ayvaz G, Rini GB, Spinaz GA, Arslan M: Atherogenic lipoprotein phenotype and LDL size and subclasses in women with gestational diabetes. *Diabetic Medicine* 2008;25:1406-1411
22. Marseille-Tremblay C, Ethier-Chiasson M, Forest J-C, Giguère Y, Masse A, Mounier C, Lafond J: Impact of maternal circulating cholesterol and gestational diabetes mellitus on lipid metabolism in human term placenta. *Molecular Reproduction and Development* 2008;75:1054-1062
23. Son GH, Kwon JY, Kim YH, Park YW: Maternal serum triglycerides as predictive factors for large-for-gestational age newborns in women with gestational diabetes mellitus. *Acta Obstet Gynecol Scand* 2010;89:700-704
24. Savvidou M, Nelson SM, Makgoba M, Messow CM, Sattar N, Nicolaides K: First-trimester prediction of gestational diabetes mellitus: examining the potential of combining maternal characteristics and laboratory measures. *Diabetes* 2010;59:3017-3022
25. Retnakaran R, Qi Y, Connelly PW, Sermer M, Hanley AJ, Zinman B: The graded relationship between glucose tolerance status in pregnancy and postpartum levels of low-density-lipoprotein cholesterol and apolipoprotein B in young women: implications for future cardiovascular risk. *J Clin Endocrinol Metab* 2010;95:4345-4353
26. Barrett HL, Gatford KL, Houda CM, De Blasio MJ, McIntyre HD, Callaway LK, Dekker Nitert M, Coat S, Owens JA, Hague WM, Rowan JA: Maternal and Neonatal Circulating Markers of Metabolic and Cardiovascular Risk in the Metformin in Gestational Diabetes (MiG) Trial: Responses to maternal metformin versus insulin treatment. *Diabetes Care* 2013;36:529-536
27. Rowan JA, Hague WM, Gao W, Battin MR, Moore MP: Metformin versus insulin for the treatment of gestational diabetes. *N Engl J Med* 2008;358:2003-2015

SUPPLEMENTARY DATA

**Supplementary Table 2.** Pharmacological agents.

| Pharmacological therapy | Placental passage                                | Effects on lipids *                                                                                                                                                                        | Safety in pregnancy                                                                                                                                                                                                                |
|-------------------------|--------------------------------------------------|--------------------------------------------------------------------------------------------------------------------------------------------------------------------------------------------|------------------------------------------------------------------------------------------------------------------------------------------------------------------------------------------------------------------------------------|
| Metformin               | Yes (1)                                          | ↓serum triglycerides, ↓total cholesterol and ↓ LDL-C, these latter two independently of glycaemic control (2)<br><br>↓free fatty acid levels from adipose tissue (3) and ↓VLDL levels (4). | No increase in congenital malformations when used in early pregnancy (5).<br><br>Similar pregnancy outcomes as insulin in randomized trials for GDM. (6-8)                                                                         |
| Insulin                 | None to minimal (9; 10)                          | ↓triglycerides by 10-40% , and normalization of lipoprotein composition (11)                                                                                                               | Safe to use                                                                                                                                                                                                                        |
| Omega-3 fatty acids     | Yes (12)                                         | 20-50% ↓in triglyceride levels, with a possible ↑/- LDL-C ↑/-HDL-C (13)                                                                                                                    | Supplementation with up to 1g/d DHA has not been reported to be harmful. (12; 14)                                                                                                                                                  |
| Statins                 | Variable depending on type of statin (15; 16)    | Anti-inflammatory, antithrombotic and antioxidant effects.<br><br>↓triglycerides by 10-40%, ↓LDL-C and ↓non-HDL-C, and ↑HDL-C (13)                                                         | No recurrent pattern of malformations reported in animal studies (17)<br><br>Statins have been shown to have effects on placental development in vitro, with decreased migration of cytotrophoblasts and syncytiotrophoblasts (18) |
| Niacin                  | Unclear                                          | ↓triglycerides by 20-50%, ↓LDL-C by 5-25%, while ↑HDL-C 15-35% (13)<br><br>↓ Hepatic synthesis of VLDL and triglycerides are also reduced (19)                                             | Very small numbers of case reports, no reported adverse infant effects (20)                                                                                                                                                        |
| Fibrates                | Unclear                                          | ↓triglyceride concentration by 20-50% , ↓ LDL-C 0-20% and ↑HDL-C levels 6-20% (13).                                                                                                        | Very small numbers of case reports, no reported adverse infant effects (20)                                                                                                                                                        |
| Resveratrol             | Likely: detected in fetal plasma in rodents (21) | ↓LDL cholesterol, ApoB, triglycerides and ↓intrahepatic lipid content (22)                                                                                                                 | Reduction in neural tube defects in rodent models of diabetic pregnancy (21)<br>Not tested in humans                                                                                                                               |

\* this refers to general effects, not pregnancy specific effects.

## SUPPLEMENTARY DATA

### References

1. Hague W M, Davoren P M, McIntyre H D, Norris R, Xiaonian X, Charles B G: Metformin crosses the placenta: A modulator for fetal insulin resistance? *British Medical Journal* 2004;327:880-881
2. Wulffele MG, Kooy A, de Zeeuw D, Stehouwer CD, Gansevoort RT: The effect of metformin on blood pressure, plasma cholesterol and triglycerides in type 2 diabetes mellitus: a systematic review. *J Intern Med* 2004;256:1-14
3. Abbasi F, Carantoni M, Chen YD, Reaven GM: Further evidence for a central role of adipose tissue in the antihyperglycemic effect of metformin. *Diabetes Care* 1998;21:1301-1305
4. Reaven GM, Johnston P, Hollenbeck CB, Skowronski R, Zhang JC, Goldfine ID, Chen YD: Combined metformin-sulfonylurea treatment of patients with noninsulin-dependent diabetes in fair to poor glycemic control. *J Clin Endocrinol Metab* 1992;74:1020-1026
5. Bolton S, Cleary B, Walsh J, Dempsey E, Turner MJ: Continuation of metformin in the first trimester of women with polycystic ovarian syndrome is not associated with increased perinatal morbidity. *Eur J Pediatr* 2009;168:203-206
6. Rowan JA, Hague WM, Gao W, Battin MR, Moore MP: Metformin versus insulin for the treatment of gestational diabetes. *N Engl J Med* 2008;358:2003-2015
7. Vanky E, Stridsklev S, Heimstad R, Romundstad P, Skogoy K, Kleggetveit O, Hjelle S, von Brandis P, Eikeland T, Flo K, Berg KF, Bunford G, Lund A, Bjerke C, Almas I, Berg AH, Danielson A, Lahmami G, Carlsen SM: Metformin versus placebo from first trimester to delivery in polycystic ovary syndrome: a randomized, controlled multicenter study. *J Clin Endocrinol Metab* 2010;95:E448-455
8. Dhulkotia JS, Ola B, Fraser R, Farrell T: Oral hypoglycemic agents vs insulin in management of gestational diabetes: a systematic review and metaanalysis. *Am J Obstet Gynecol* 2010;203:457 e451-459
9. Boskovic R, Feig DS, Derewlany L, Knie B, Portnoi G, Koren G: Transfer of insulin lispro across the human placenta: in vitro perfusion studies. *Diabetes Care* 2003;26:1390-1394
10. Pollex EK, Feig DS, Lubetsky A, Yip PM, Koren G: Insulin glargine safety in pregnancy: a transplacental transfer study. *Diabetes Care* 2010;33:29-33
11. Lindstrom T, Arnqvist HJ, Olsson AG: Effect of different insulin regimens on plasma lipoprotein and apolipoprotein concentrations in patients with non-insulin-dependent diabetes mellitus. *Atherosclerosis* 1990;81:137-144
12. Larque E, Demmelmair H, Gil-Sanchez A, Prieto-Sanchez MT, Blanco JE, Pagan A, Faber FL, Zamora S, Parrilla JJ, Koletzko B: Placental transfer of fatty acids and fetal implications. *Am J Clin Nutr* 2011;94:1908S-1913S
13. Bays H: Rationale for prescription omega-3-acid ethyl ester therapy for hypertriglyceridemia: a primer for clinicians. *Drugs of today (Barcelona, Spain : 1998)* 2008;44:205-246
14. Larque E, Gil-Sanchez A, Prieto-Sanchez MT, Koletzko B: Omega 3 fatty acids, gestation and pregnancy outcomes. *Br J Nutr* 2012;107 Suppl 2:S77-84
15. Nanovskaya TN, Patrikeeva SL, Paul J, Costantine MM, Hankins GD, Ahmed MS: Transplacental transfer and distribution of pravastatin. *Am J Obstet Gynecol* 2013;209:373 e371-375
16. Vahakangas K, Myllynen P: Drug transporters in the human blood-placental barrier. *Br J Pharmacol* 2009;158:665-678
17. Kusters DM, Lahsinoui HH, van de Post JA, Wiegman A, Wijburg FA, Kastelein JJ, Hutten BA: Statin use during pregnancy: a systematic review and meta-analysis. *Expert Rev Cardiovasc Ther* 2012;10:363-378
18. Lecarpentier E, Morel O, Fournier T, Elefant E, Chavatte-Palmer P, Tsatsaris V: Statins and pregnancy: between supposed risks and theoretical benefits. *Drugs* 2012;72:773-788
19. Kei A, Elisaf MS: Nicotinic acid: clinical considerations. *Expert Opin Drug Saf* 2012;11:551-564



## SUPPLEMENTARY DATA

20. Goldberg AS, Hegele RA: Severe hypertriglyceridemia in pregnancy. *J Clin Endocrinol Metab* 2012;97:2589-2596
21. Singh CK, Kumar A, Lavoie HA, Dipette DJ, Singh US: Diabetic complications in pregnancy: is resveratrol a solution? *Exp Biol Med* (Maywood) 2013;
22. Cottart CH, Nivet-Antoine V, Beaudoux JL: Review of recent data on the metabolism, biological effects, and toxicity of resveratrol in humans. *Mol Nutr Food Res* 2013;
